# Supplementary material for: Bacillus Coagulans SKB LAB-19: A Potential Probiotic in Humans and Animal Healthcare
Source: Research Square preprint supplement (doi:10.21203/rs.3.rs-640678/v1), 2021-06-28
Supplement: Supplementary file 1 [file 31a139e2763af076928b1666.docx]

**Supplementary information**

**Fig. S1** Phylogenetic tree showing close relationship of isolate SKB LAB-19 with other species based on Neighbor-joining method

**Table S1** Diarrhoea scale

| **Scale** | **Grade** | **Condition** |
| --- | --- | --- |
| 0 | Solid | Normal stool |
| 1 | Semi solid | Slightly wet and soft stool |
| 2 | Flaccid | Wet and Unformed shaped stool |
| 3 | Liquid | Watery stool |
